# Supplementary material
Source: publisher figshare collection journal article supplement (https://karger.figshare.com/ndownloader/files/28913625)
Supplement: Supplementary file 1 [file 28913625]

**Supplementary Table 1:** Comparison of characteristics between test/training and overall

|  | **Test** | **Training** | **Remainder** |
| --- | --- | --- | --- |
| **Characteristic, n (%)** | **n=14** | **n=6** | **n=143** |
| **Sex** |  |  |  |
| Female | 7 (50) | 3 (50) | 53 (37) |
| Male | 7 (50) | 3 (50) | 90 (63) |
| **Age** |  |  |  |
| <50 | 2 (14) | 1 (17) | 41 (29) |
| 50-60 | 2 (14) | 3 (50) | 49 (34) |
| >60 | 10 (71) | 2 (33) | 53 (37) |
| **Ancestry** |  |  |  |
| British/Irish only | 9 (64) | 4 (67) | 94 (66) |
| Other | 5 (36) | 2 (33) | 49 (34) |
| **Innate Skin Colour** |  |  |  |
| Fair | 12 (86) | 4 (67) | 110 (77) |
| Medium/Olive | 2 (14) | 2 (33) | 32 (23) |
| **Eye Colour** |  |  |  |
| Blue or Grey | 6 (43) | 5 (83) | 73 (51) |
| Green or Hazel | 4 (29) | 0 (0) | 22 (15) |
| Brown | 4 (29) | 1 (17) | 47 (33) |
| **Skin reaction to Acute Sun** |  |  |  |
| Only tan | 2 (14) | 0 (0) | 13 (9) |
| Burn then tan | 6 (43) | 4 (67) | 96 (67) |
| Always Burn | 6 (43) | 2 (33) | 34 (24) |
| **Number of Moles ≥ 2mm** |  |  |  |
| Few (0-20) | 13 (93) | 4 (67) | 87 (63) |
| Some (20-50) | 1 (7) | 1 (17) | 34 (24) |
| Many (50+) | 0 (0) | 1 (17) | 18 (13) |
| **Freckling Score** |  |  |  |
| None/Mild | 7 (50) | 2 (33) | 81 (57) |
| Mod/Sev | 7 (50) | 4 (67) | 62 (43) |
| **Number of burns before age 20** |  |  |  |
| ≤ 10 | 5 (36) | 1 (17) | 57 (40) |
| > 10 | 9 (64) | 5 (83) | 86 (60) |
| **Family History of Melanoma** |  |  |  |
| No | 7 (50) | 4 (67) | 110 (77) |
| Yes | 7 (50) | 2 (33) | 33 (23) |
| **Personal history of Melanoma** |  |  |  |
| No | 13 (93) | 4 (67) | 135 (94) |
| Yes | 1 (7) | 2 (33) | 8 (6) |
| **Keratinocyte Skin Cancer**** |  |  |  |
| No | 9 (64) | 3 (50) | 102 (71) |
| Yes | 5 (36) | 3 (50) | 41 (29) |
|  |  |  |  |
